# Supplementary material
Source: publisher figshare collection journal article supplement (https://acs.figshare.com/ndownloader/files/3964234)
Supplement: Supplementary file 1 [file 3964234]

Supporting Information for

**Kinetics of 3,4-dihydro-2H-3-Phenyl-1,3-benzoxazine synthesis from  
Mannich base and formaldehyde**

Yuyuan Deng, Qin Zhang, Huachuan Zhang, Chengxi Zhang, Wenhui Wang, Yi Gu\*

State Key Laboratory of Polymer Materials Engineering, College of Polymer Science  
and Engineering, Sichuan University, Chengdu, Sichuan 610065, PR China

AUTHOR INFORMATION

**Corresponding Author**

E-mail: [guyi@scu.edu.cn](mailto:guyi@scu.edu.cn)

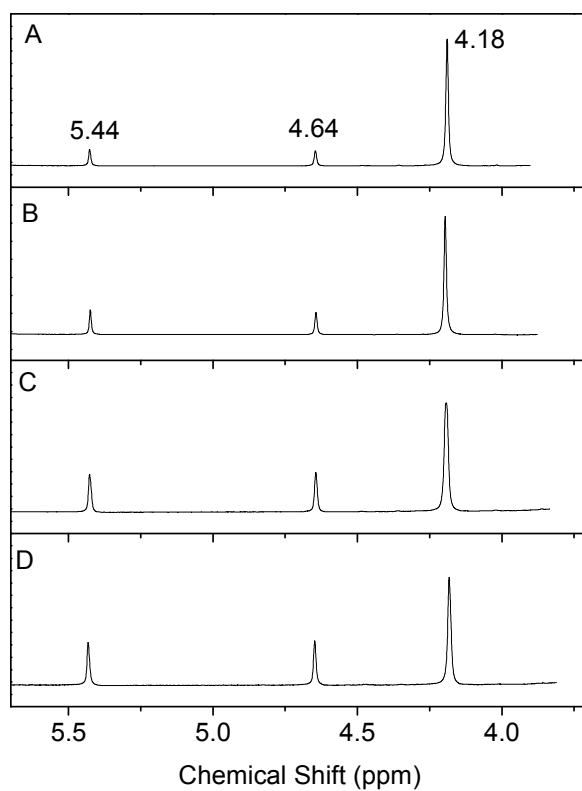

**Figure S1. <sup>1</sup>H NMR spectra of reaction solutions with n-propylamine added. Reaction conditions: Temperature, 30 °C; initial concentration, [MB]<sub>0</sub>=0.8 mol/kg, [F]<sub>0</sub>=0.8 mol/kg; Time, A.412 s, B.652 s, C.952 s, D. 1252 s.**

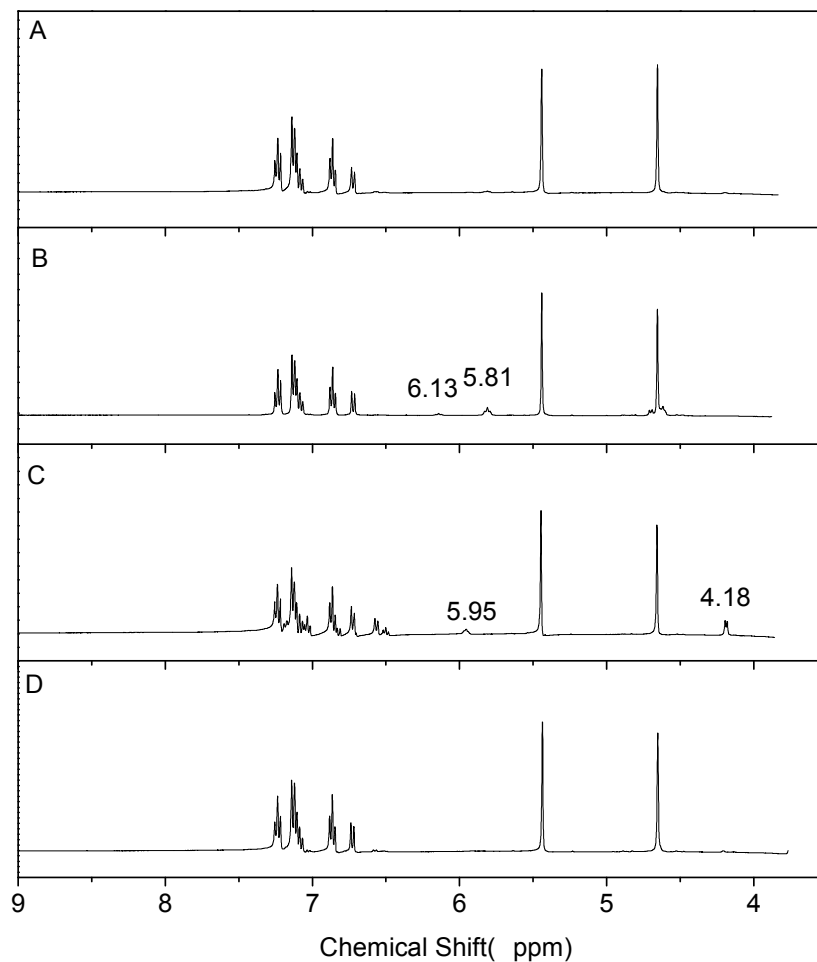

**Figure S2.  $^1\text{H}$ -NMR spectra of Mannich base and formaldehyde reaction solution at 30 °C for 24h. A. equal mole,  $[\text{MB}]_0 = 0.8 \text{ mol/kg}$ ,  $[\text{F}]_0 = 0.8 \text{ mol/kg}$ ; B. formaldehyde excess,  $[\text{MB}]_0 = 0.6 \text{ mol/kg}$ ,  $[\text{F}]_0 = 0.8 \text{ mol/kg}$ ; C. Mannich base excess,  $[\text{MB}]_0 = 0.8 \text{ mol/kg}$ ,  $[\text{F}]_0 = 0.6 \text{ mol/kg}$ ; D. equal molar and added NaOH,  $[\text{MB}]_0 = 0.8 \text{ mol/kg}$ ,  $[\text{F}]_0 = 0.8 \text{ mol/kg}$ , pH=8**

In Figure S2B, signals at 6.13 ppm, 5.81 ppm and 4.5 - 4.8 ppm are protons in remaining formaldehyde, and in Figure S2C, signals at 4.18 ppm and 5.95 ppm are attributed to  $\text{N-CH}_2\text{-Ar}$  and  $\text{NH}$  in Mannich base.

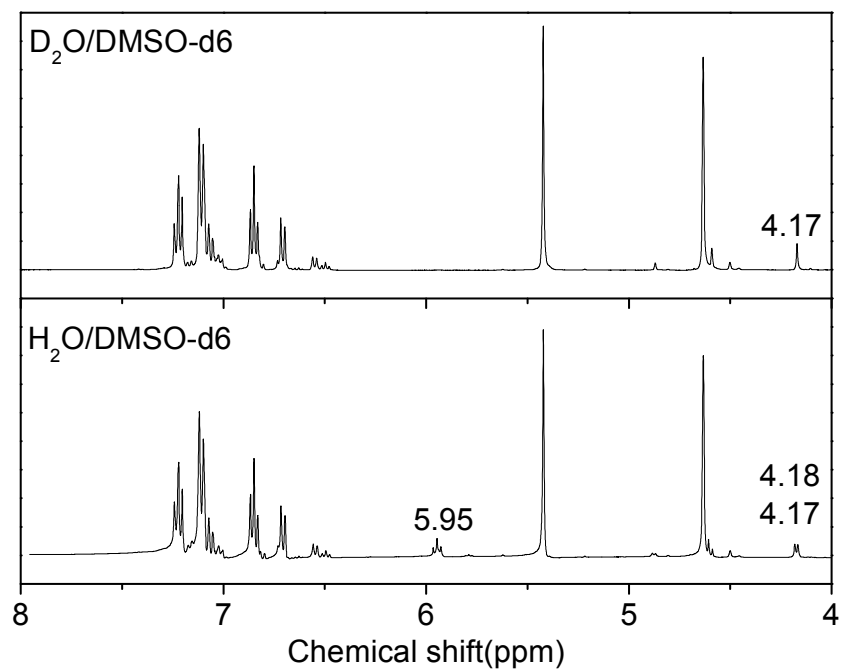

Figure S3  $^1\text{H}$ -NMR spectra of benzoxanine and water/deuteroxide in  $\text{DMSO-d}_6$  at  $40^\circ\text{C}$  for 24h

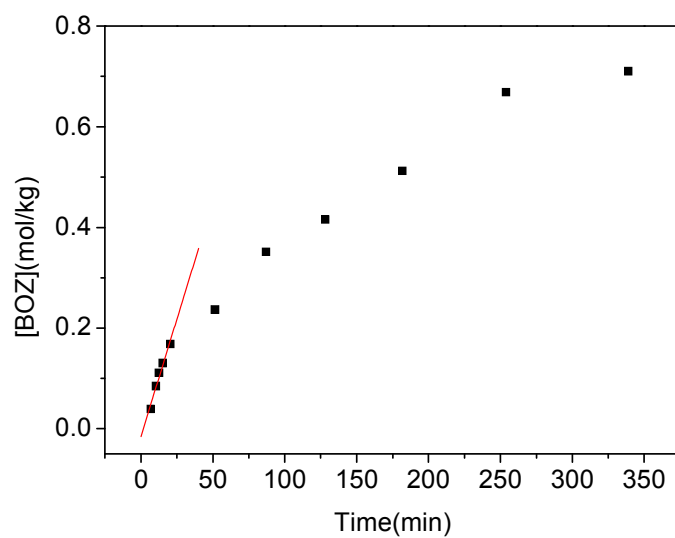

**Figure S4 Benzoxazine concentration versus time at 30 °C ([MB]<sub>0</sub> = 0.8 mol/kg, [F]<sub>0</sub> = 0.8 mol/kg )**

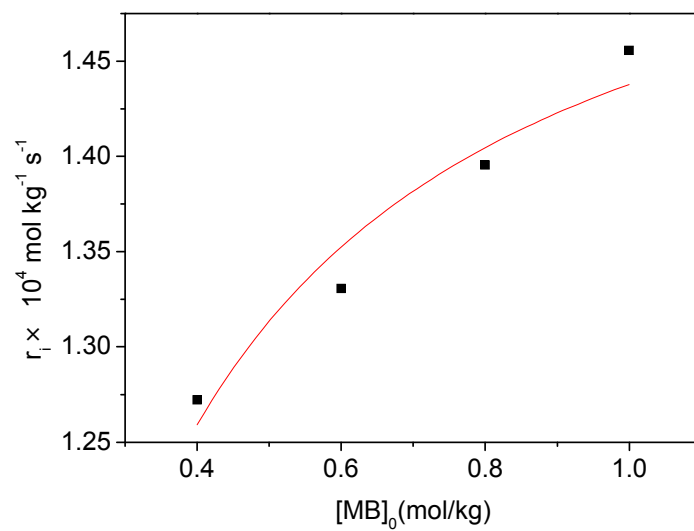

**Figure S5 Initial rate of benzoxazine formation versus initial concentration of Mannich base at 30 °C. [F]<sub>0</sub>=0.8mol/kg**
